# Supplementary material
Source: Research Square preprint supplement (doi:10.21203/rs.3.rs-9678007/v1)
Supplement: Supplementary file 2 [file fd75c0c474ec60a17bdf67df.docx]

Table 1 Baseline characteristics of the cohort included in the Cox proportional hazards analysis, stratified by incident psoriasis.

| **Characteristic** | **Overall** N = 4017701 | **Non-psoriasis** N = 3886591 | **Psoriasis** N = 131111 | ***p-value***2 |
| --- | --- | --- | --- | --- |
| **Age (years)** | 56.6 ± 8.1 | 56.5 ± 8.1 | 56.9 ± 8.0 | <0.001 |
| **Sex** |  |  |  | <0.001 |
| Male | 185,540 (46.2%) | 178,929 (46.0%) | 6,611 (50.4%) |  |
| Female | 216,230 (53.8%) | 209,730 (54.0%) | 6,500 (49.6%) |  |
| **Ethnicity** |  |  |  | <0.001 |
| White | 379,800 (94.5%) | 367,159 (94.5%) | 12,641 (96.4%) |  |
| non-white | 16,200 (4.0%) | 15,882 (4.1%) | 318 (2.4%) |  |
| Missing | 5,770 (1.4%) | 5,618 (1.4%) | 152 (1.2%) |  |
| **Townsend Deprivation Index** |  |  |  | <0.001 |
| 1(least deprived) | 101,507 (25.3%) | 98,405 (25.3%) | 3,102 (23.7%) |  |
| 2 | 100,746 (25.1%) | 97,627 (25.1%) | 3,119 (23.8%) |  |
| 3 | 100,760 (25.1%) | 97,432 (25.1%) | 3,328 (25.4%) |  |
| 4(most deprived) | 98,268 (24.5%) | 94,721 (24.4%) | 3,547 (27.1%) |  |
| Missing | 489 (0.1%) | 474 (0.1%) | 15 (0.1%) |  |
| **Education Level** |  |  |  | <0.001 |
| Degree | 129,474 (32.2%) | 125,557 (32.3%) | 3,917 (29.9%) |  |
| Below degree | 267,578 (66.6%) | 258,521 (66.5%) | 9,057 (69.1%) |  |
| Missing | 4,718 (1.2%) | 4,581 (1.2%) | 137 (1.0%) |  |
| **Smoking Status** |  |  |  | <0.001 |
| Never | 218,293 (54.3%) | 212,510 (54.7%) | 5,783 (44.1%) |  |
| Current | 42,321 (10.5%) | 40,370 (10.4%) | 1,951 (14.9%) |  |
| Previous | 139,162 (34.6%) | 133,846 (34.4%) | 5,316 (40.5%) |  |
| Missing | 1,994 (0.5%) | 1,933 (0.5%) | 61 (0.5%) |  |
| **Alcohol Intake** |  |  |  | <0.001 |
| Never | 17,400 (4.3%) | 16,914 (4.4%) | 486 (3.7%) |  |
| Current | 369,089 (91.9%) | 357,043 (91.9%) | 12,046 (91.9%) |  |
| Previous | 14,336 (3.6%) | 13,786 (3.5%) | 550 (4.2%) |  |
| Missing | 945 (0.2%) | 916 (0.2%) | 29 (0.2%) |  |
| **Physical Activity** |  |  |  | <0.001 |
| Yes | 296,263 (73.7%) | 286,893 (73.8%) | 9,370 (71.5%) |  |
| No | 14,678 (3.7%) | 14,061 (3.6%) | 617 (4.7%) |  |
| Missing | 90,829 (22.6%) | 87,705 (22.6%) | 3,124 (23.8%) |  |
| **Comorbidities** |  |  |  |  |
| T1DM | 4,163 (1.0%) | 4,061 (1.0%) | 102 (0.8%) | <0.001 |
| T2DM | 33,045 (8.2%) | 32,404 (8.3%) | 641 (4.9%) | <0.001 |
| Hypertension | 167,910 (41.8%) | 161,489 (41.6%) | 6,421 (49.0%) | <0.001 |
| CVD | 24,432 (6.1%) | 23,346 (6.0%) | 1,086 (8.3%) | <0.001 |
| **PRS** |  |  |  | <0.001 |
| Low risk | 63,512 (15.8%) | 62,046 (16.0%) | 1,466 (11.2%) |  |
| Intermediate risk | 273,109 (68.0%) | 264,271 (68.0%) | 8,838 (67.4%) |  |
| High risk | 62,995 (15.7%) | 60,245 (15.5%) | 2,750 (21.0%) |  |
| Missing | 2,154 (0.5%) | 2,097 (0.5%) | 57 (0.4%) |  |
| **TG(mg/dL)** | 131.5 (92.7, 190.4) | 131.3 (92.6, 190.0) | 140.1 (98.1, 204.1) | <0.001 |
| **TC(mg/dL)** | 220.2 ± 44.2 | 220.3 ± 44.2 | 218.2 ± 45.1 | <0.001 |
| **HDL-C(mg/dL)** | 56.0 ± 14.8 | 56.1 ± 14.8 | 54.3 ± 14.7 | <0.001 |
| **LDL-C(mg/dL)** | 137.7 ± 33.6 | 137.8 ± 33.6 | 136.9 ± 34.1 | 0.002 |
| **ALT(U/L)** | 20.2 (15.4, 27.4) | 20.1 (15.4, 27.4) | 21.3 (16.0, 29.4) | <0.001 |
| **AST(U/L)** | 24.4 (21.0, 28.8) | 24.4 (21.0, 28.8) | 25.0 (21.4, 29.9) | <0.001 |
| **Scr(mg/dL)** | 0.8 (0.7, 0.9) | 0.8 (0.7, 0.9) | 0.8 (0.7, 0.9) | 0.263 |
| **CRP(mg/dL)** | 0.1 (0.1, 0.3) | 0.1 (0.1, 0.3) | 0.2 (0.1, 0.4) | <0.001 |
| **eGDR** | 9.9 ± 2.5 | 9.9 ± 2.5 | 9.4 ± 2.6 | <0.001 |
| **VAI** | 1.7 (1.1, 2.7) | 1.7 (1.0, 2.7) | 1.9 (1.2, 3.0) | <0.001 |
| **TyG** | 8.7 ± 0.6 | 8.7 ± 0.6 | 8.8 ± 0.6 | <0.001 |
| **TyG-BMI** | 240.0 ± 49.7 | 239.7 ± 49.6 | 249.3 ± 53.2 | <0.001 |
| **TyG-WC** | 790.7 ± 147.6 | 789.6 ± 147.2 | 821.9 ± 154.4 | <0.001 |
| **TyG-WHtR** | 4.7 ± 0.8 | 4.7 ± 0.8 | 4.9 ± 0.9 | <0.001 |
| **LAP** | 42.0 (23.1, 72.4) | 41.8 (23.0, 72.0) | 49.0 (27.3, 82.7) | <0.001 |
| **METS-IR** | 40.3 ± 9.4 | 40.2 ± 9.3 | 42.1 ± 10.1 | <0.001 |
| **AIP** | 0.9 ± 0.7 | 0.9 ± 0.7 | 1.0 ± 0.7 | <0.001 |
| 1Normally distributed continuous variables are presented as mean ± standard deviation; non-normally distributed continuous variables are presented as median (interquartile range); categorical variables are presented as n (%).  2Welch Two Sample t-test; Pearson's Chi-squared test; Wilcoxon rank sum test.  ***Abbreviations***:*TG*, Triglycerides; *TC*, Total Cholesterol; *HDL-C*, High-Density Lipoprotein Cholesterol; *LDL-C*, Low-Density Lipoprotein Cholesterol; *ALT*, Alanine Aminotransferase; *AST*, Aspartate Aminotransferase; *Scr*, Serum Creatinine; *CRP*, C-Reactive Protein; *T1DM*; Type 1 Diabetes Mellitus; *T2DM*; Type 2 Diabetes Mellitus; *CVD*, Cardiovascular Disease; *PRS*, Polygenic Risk Score; *eGDR*, estimated Glucose Disposal Rate; *VAI*, Visceral Adiposity Index; *TyG*, Triglyceride-Glucose; *TyG-BMI*, TyG-Body Mass Index; *TyG-WC*, TyG-Waist Circumference; *TyG-WHtR*, TyG-Waist To Height Ratio; *LAP*, Lipid Accumulation Product; *METS-IR*, Metabolic Score For Insulin Resistance; *AIP*, Atherogenic Index Of Plasma. | | | | |

Table 2 Association of insulin resistance surrogate indices with incident psoriasis: results from Cox proportional hazards models.

|  | **Model0** | | **Model1** | | **Model2** | | **Model3** | |
| --- | --- | --- | --- | --- | --- | --- | --- | --- |
| **Indicators** | **HR(95%CI)** | **P** | **HR(95%CI)** | **P** | **HR(95%CI)** | **P** | **HR(95%CI)** | **P** |
| eGDR | 0.743 (0.721–0.765) | <0.001 | 0.755 (0.731–0.781) | <0.001 | 0.758 (0.731–0.786) | <0.001 | 0.774 (0.746–0.805) | <0.001 |
| VAI | 1.125 (1.096–1.155) | <0.001 | 1.105 (1.075–1.135) | <0.001 | 1.060 (1.030–1.091) | <0.001 | 1.052 (1.021–1.084) | <0.001 |
| TyG | 1.141 (1.107–1.177) | <0.001 | 1.104 (1.069–1.139) | <0.001 | 1.055 (1.020–1.090) | 0.0016 | 1.060 (1.008–1.114) | 0.023 |
| TyG-BMI | 1.227 (1.193–1.262) | <0.001 | 1.195 (1.161–1.230) | <0.001 | 1.143 (1.107–1.180) | <0.001 | 1.136 (1.095–1.179) | <0.001 |
| TyG-WC | 1.263 (1.226–1.301) | <0.001 | 1.244 (1.203–1.285) | <0.001 | 1.178 (1.136–1.221) | <0.001 | 1.191 (1.140–1.244) | <0.001 |
| TyG-WHtR | 1.267 (1.230–1.305) | <0.001 | 1.226 (1.189–1.265) | <0.001 | 1.164 (1.125–1.205) | <0.001 | 1.173 (1.125–1.222) | <0.001 |
| LAP | 1.180 (1.151–1.210) | <0.001 | 1.152 (1.122–1.183) | <0.001 | 1.102 (1.070–1.134) | <0.001 | 1.159 (1.110–1.209) | <0.001 |
| METS-IR | 1.231 (1.196–1.266) | <0.001 | 1.201 (1.166–1.237) | <0.001 | 1.147 (1.110–1.185) | <0.001 | 1.139 (1.093–1.188) | <0.001 |
| AIP | 1.152 (1.117–1.188) | <0.001 | 1.120 (1.084–1.158) | <0.001 | 1.066 (1.031–1.103) | <0.001 | 1.018 (0.914–1.135) | 0.744 |
| **Model 0:** Crude model.  **Model 1:** Adjusted for age, sex, ethnicity, townsend deprivation index and educational background.  **Model 2:** Adjusted for model 1 plus smoking status, alcohol status, physical activity, diabetes, hypertension, CVD and PRS.  **Model 3:** Adjusted for model 2 plus TG, TC, HDL-C, LDL-C, ALT, AST, Scr and CRP.  ***Abbreviations****: HR*, Hazard Ratio; *CI*, Confidence Interval*e*; *eGDR*, estimated Glucose Disposal Rate; *VAI*, Visceral Adiposity Index; *TyG*, Triglyceride-Glucose; *TyG-BMI*, TyG-Body Mass Index; *TyG-WC*, TyG-Waist Circumference; *TyG-WHtR*, TyG-Waist To Height Ratio; *LAP*, Lipid Accumulation Product; *METS-IR*, Metabolic Score For Insulin Resistance; *AIP*, Atherogenic Index Of Plasma; *CVD*, Cardiovascular Disease; *PRS*, Polygenic Risk Score; *TG*, Triglycerides; *TC*, Total Cholesterol; *HDL-C*, High-Density Lipoprotein Cholesterol; *LDL-C*, Low-Density Lipoprotein Cholesterol; *ALT*, Alanine Aminotransferase; *AST*, Aspartate Aminotransferase; *Scr*, Serum Creatinine; *CRP*, C-Reactive Protein.  HRs are presented as per 1 SD increase in the IR surrogate indexes for psoriasis risk. | | | | | | | | |

Table 3 Association between insulin resistance surrogate indices and psoriasis risk in different age and gender groups: results from Cox proportional hazards models.

| **Indicators** | **Age** | | | | **Sex** | | | |
| --- | --- | --- | --- | --- | --- | --- | --- | --- |
|  | **Subgroup** | **HR (95% CI)** | **P** | **P-int** | **Subgroup** | **HR (95% CI)** | **P** | **P-int** |
| eGDR |  | 0.769 (0.741–0.798) | <0.001 | 0.004 |  | 0.775 (0.746–0.805) | <0.001 | 0.651 |
|  | <60 | 0.740 (0.704–0.778) | <0.001 |  | Male | 0.784 (0.742–0.829) | <0.001 |  |
|  | >=60 | 0.820 (0.774–0.868) | <0.001 |  | Female | 0.763 (0.724–0.805) | <0.001 |  |
| VAI |  | 1.052 (1.021–1.083) | <0.001 | 0.007 | Sex | 1.052 (1.021–1.084) | <0.001 | 0.759 |
|  | <60 | 1.081 (1.040–1.124) | <0.001 |  | Male | 1.063 (1.021–1.107) | 0.003 |  |
|  | >=60 | 1.016 (0.969–1.065) | 0.506 |  | Female | 1.042 (0.995–1.090) | 0.078 |  |
| TyG |  | 1.066 (1.014–1.120) | 0.012 | 0.004 | Sex | 1.059 (1.008–1.114) | 0.024 | 0.707 |
|  | <60 | 1.107 (1.035–1.184) | 0.003 |  | Male | 1.047 (0.977–1.123) | 0.193 |  |
|  | >=60 | 1.012 (0.939–1.090) | 0.758 |  | Female | 1.078 (1.003–1.159) | 0.041 |  |
| TyG-BMI |  | 1.134 (1.093–1.177) | <0.001 | <0.001 | Sex | 1.131 (1.090–1.173) | <0.001 | 0.933 |
|  | <60 | 1.166 (1.112–1.224) | <0.001 |  | Male | 1.126 (1.063–1.194) | <0.001 |  |
|  | >=60 | 1.076 (1.014–1.140) | 0.015 |  | Female | 1.150 (1.096–1.208) | <0.001 |  |
| TyG-WC |  | 1.193 (1.142–1.246) | <0.001 | 0.003 | Sex | 1.188 (1.138–1.240) | <0.001 | 0.839 |
|  | <60 | 1.241 (1.171–1.315) | <0.001 |  | Male | 1.168 (1.096–1.245) | <0.001 |  |
|  | >=60 | 1.117 (1.045–1.194) | 0.001 |  | Female | 1.217 (1.145–1.293) | <0.001 |  |
| TyG-WHtR |  | 1.176 (1.129–1.225) | <0.001 | <0.001 | Sex | 1.172 (1.125–1.221) | <0.001 | 0.88 |
|  | <60 | 1.223 (1.158–1.293) | <0.001 |  | Male | 1.153 (1.082–1.228) | <0.001 |  |
|  | >=60 | 1.104 (1.037–1.175) | 0.002 |  | Female | 1.194 (1.130–1.261) | <0.001 |  |
| LAP |  | 1.158 (1.110–1.209) | <0.001 | 0.011 | Sex | 1.158 (1.110–1.209) | <0.001 | 0.293 |
|  | <60 | 1.186 (1.122–1.253) | <0.001 |  | Male | 1.139 (1.075–1.207) | <0.001 |  |
|  | >=60 | 1.113 (1.041–1.190) | 0.002 |  | Female | 1.191 (1.116–1.270) | <0.001 |  |
| METS-IR |  | 1.135 (1.089–1.183) | <0.001 | <0.001 | Sex | 1.136 (1.090–1.184) | <0.001 | 0.934 |
|  | <60 | 1.168 (1.107–1.232) | <0.001 |  | Male | 1.122 (1.053–1.196) | <0.001 |  |
|  | >=60 | 1.073 (1.004–1.146) | 0.039 |  | Female | 1.158 (1.095–1.225) | <0.001 |  |
| AIP |  | 1.055 (1.017–1.094) | 0.004 | 0.007 | Sex | 1.058 (1.021–1.097) | 0.002 | 0.782 |
|  | <60 | 1.093 (1.041–1.148) | <0.001 |  | Male | 1.059 (1.009–1.112) | 0.021 |  |
|  | >=60 | 1.010 (0.956–1.068) | 0.716 |  | Female | 1.054 (0.997–1.115) | 0.063 |  |
| Each subgroup was adjusted for age, sex, ethnicity, townsend deprivation index, educatiol background, smoking status, alcohol status, physical activity, diabetes, hypertension, CVD, PRS, TG, TC, HDL-C, LDL-C, ALT, AST, Scr and CRP.  ***Abbreviations****: HR*, Hazard Ratio; *CI*, Confidence Interval*e*; *eGDR*, estimated Glucose Disposal Rate; *VAI*, Visceral Adiposity Index; *TyG*, Triglyceride-Glucose; *TyG-BMI*, TyG-Body Mass Index; *TyG-WC*, TyG-Waist Circumference; *TyG-WHtR*, TyG-Waist To Height Ratio; *LAP*, Lipid Accumulation Product; *METS-IR*, Metabolic Score For Insulin Resistance; *AIP*, Atherogenic Index Of Plasma; *CVD*, Cardiovascular Disease; *PRS*, Polygenic Risk Score; *TG*, Triglycerides; *TC*, Total Cholesterol; *HDL-C*, High-Density Lipoprotein Cholesterol; *LDL-C*, Low-Density Lipoprotein Cholesterol; *ALT*, Alanine Aminotransferase; *AST*, Aspartate Aminotransferase; *Scr*, Serum Creatinine; *CRP*, C-Reactive Protein.  HRs are presented as per 1 SD increase in the IR surrogate indexes for psoriasis risk. | | | | | | | | |

Table 4 Association of insulin resistance surrogate indices with incident psoriasis after excluding cases occurring within the first two years of follow-up.

|  | **Model0** | | **Model1** | | **Model2** | | **Model3** | |
| --- | --- | --- | --- | --- | --- | --- | --- | --- |
| **Indicators** | **HR(95%CI)** | **P** | **HR(95%CI)** | **P** | **HR(95%CI)** | **P** | **HR(95%CI)** | **P** |
| eGDR | 0.749 (0.727–0.772) | <0.001 | 0.762 (0.737–0.788) | <0.001 | 0.755 (0.728–0.783) | <0.001 | 0.771 (0.742–0.801) | <0.001 |
| VAI | 1.121 (1.091–1.151) | <0.001 | 1.101 (1.071–1.131) | <0.001 | 1.063 (1.033–1.094) | <0.001 | 1.057 (1.025–1.089) | <0.001 |
| TyG | 1.134 (1.100–1.169) | <0.001 | 1.097 (1.062–1.133) | <0.001 | 1.057 (1.023–1.093) | 0.001 | 1.068 (1.016–1.124) | 0.010 |
| TyG-BMI | 1.216 (1.182–1.251) | <0.001 | 1.184 (1.150–1.220) | <0.001 | 1.144 (1.107–1.181) | <0.001 | 1.139 (1.097–1.182) | <0.001 |
| TyG-WC | 1.251 (1.214–1.289) | <0.001 | 1.231 (1.191–1.273) | <0.001 | 1.180 (1.137–1.224) | <0.001 | 1.196 (1.144–1.250) | <0.001 |
| TyG-WHtR | 1.255 (1.218–1.293) | <0.001 | 1.215 (1.177–1.253) | <0.001 | 1.166 (1.126–1.207) | <0.001 | 1.177 (1.129–1.227) | <0.001 |
| LAP | 1.174 (1.144–1.204) | <0.001 | 1.146 (1.115–1.178) | <0.001 | 1.104 (1.072–1.136) | <0.001 | 1.165 (1.115–1.216) | <0.001 |
| METS-IR | 1.220 (1.186–1.255) | <0.001 | 1.191 (1.156–1.227) | <0.001 | 1.149 (1.112–1.187) | <0.001 | 1.142 (1.095–1.191) | <0.001 |
| AIP | 1.145 (1.110–1.181) | <0.001 | 1.114 (1.078–1.151) | <0.001 | 1.067 (1.032–1.104) | <0.001 | 1.007 (0.903–1.123) | 0.895 |
| **Model 0:** Crude model.  **Model 1:** Adjusted for age, sex, ethnicity, townsend deprivation index and educational background.  **Model 2:** Adjusted for model 1 plus smoking status, alcohol status, physical activity, diabetes, hypertension, CVD and PRS.  **Model 3:** Adjusted for model 2 plus TG, TC, HDL-C, LDL-C, ALT, AST, Scr and CRP.  ***Abbreviations****: HR*, Hazard Ratio; *CI*, Confidence Interval*e*; *eGDR*, estimated Glucose Disposal Rate; *VAI*, Visceral Adiposity Index; *TyG*, Triglyceride-Glucose; *TyG-BMI*, TyG-Body Mass Index; *TyG-WC*, TyG-Waist Circumference; *TyG-WHtR*, TyG-Waist To Height Ratio; *LAP*, Lipid Accumulation Product; *METS-IR*, Metabolic Score For Insulin Resistance; *AIP*, Atherogenic Index Of Plasma; *CVD*, Cardiovascular Disease; *PRS*, Polygenic Risk Score; *TG*, Triglycerides; *TC*, Total Cholesterol; *HDL-C*, High-Density Lipoprotein Cholesterol; *LDL-C*, Low-Density Lipoprotein Cholesterol; *ALT*, Alanine Aminotransferase; *AST*, Aspartate Aminotransferase; *Scr*, Serum Creatinine; *CRP*, C-Reactive Protein.  HRs are presented as per 1 SD increase in the IR surrogate indexes for psoriasis risk. | | | | | | | | |
